# Supplementary material for: Kinetic modelling of Pt/γ-Al2O3–Cl catalysts formulation changes in n-heptane reforming
Source: Royal Society of Chemistry journal article supplement (doi:10.1039/d1re00073j), 2021-01-01
Supplement: d1re00073j1.pdf [file d1re00073j1.pdf]

## Kinetic modelling of Pt/ $\gamma$ -Al<sub>2</sub>O<sub>3</sub>-Cl catalysts formulation changes in *n*-heptane reforming: supplementary information

### Kinetic model validation: complements

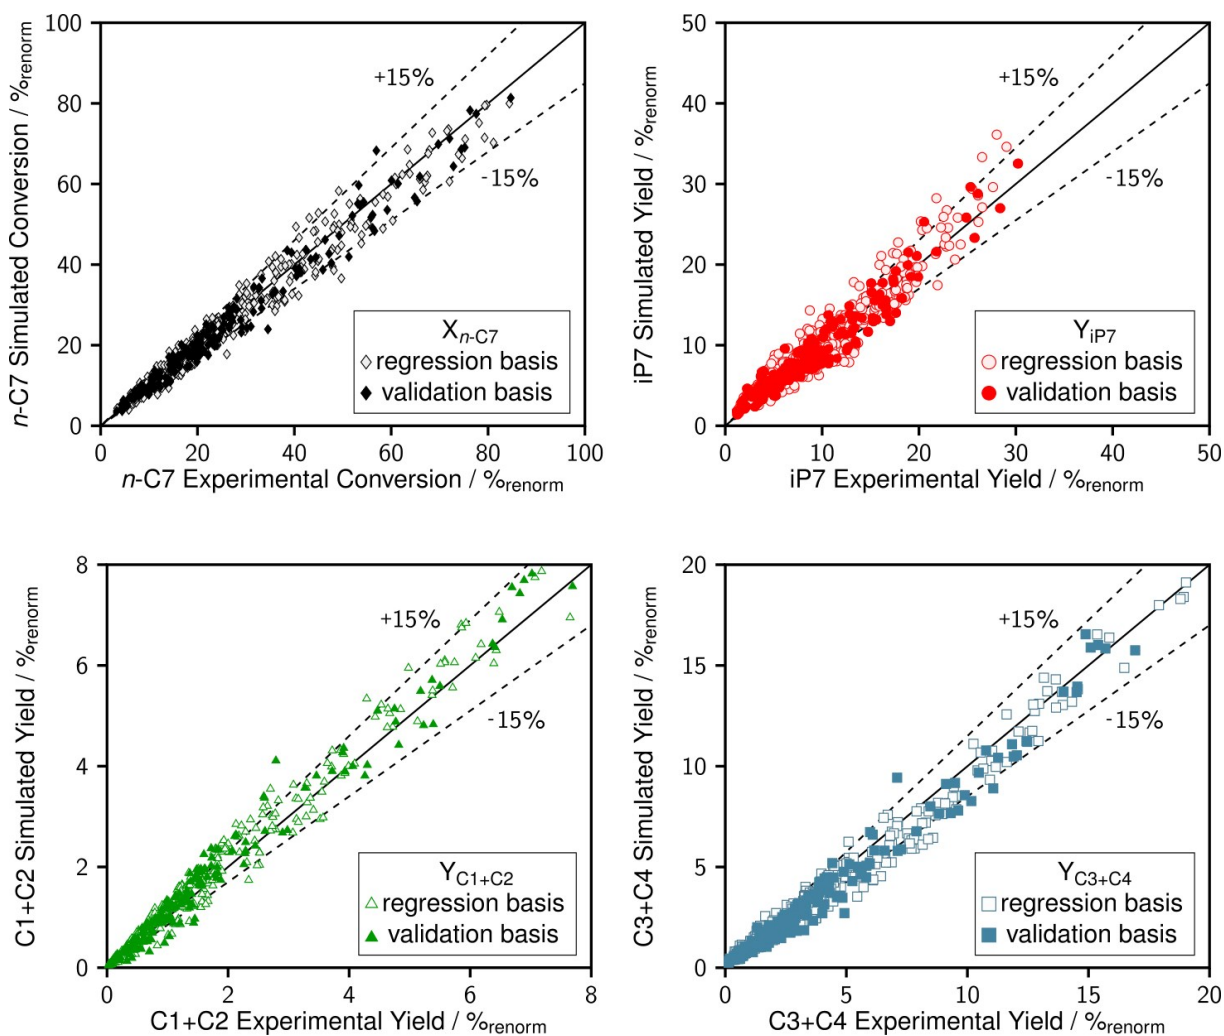

Figure 1: Parity plots obtained with the nine T-flat catalysts.

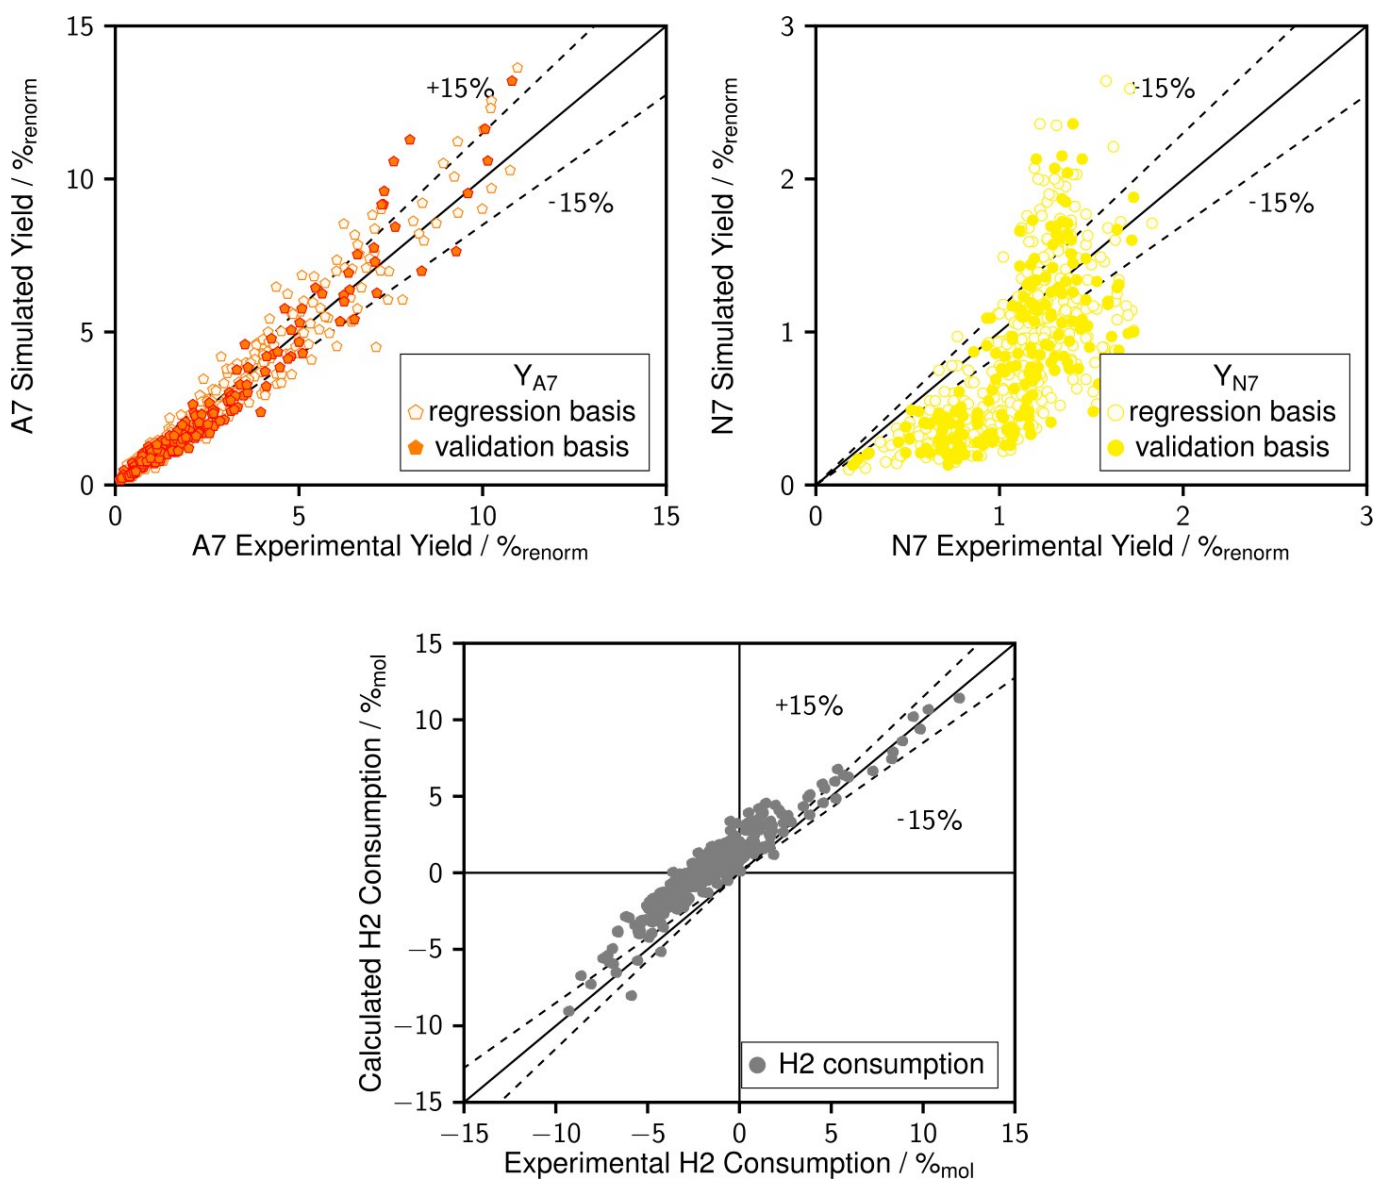

Figure 2: Parity plots obtained with the nine T-flat catalysts.

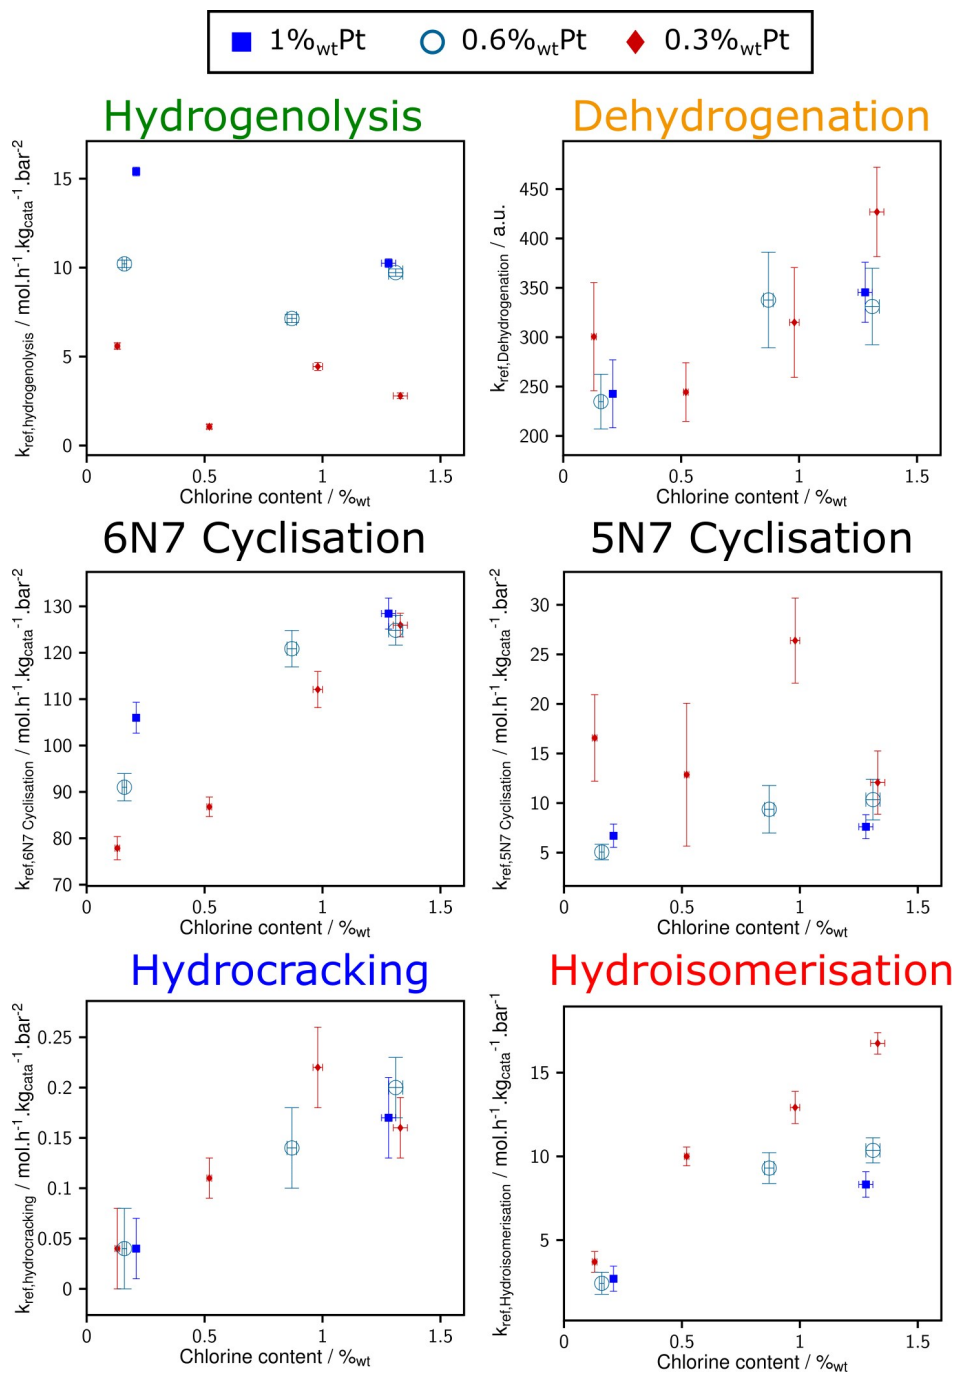

Figure 3: Reference rate constants fitted on T-flat catalysts.

## Reference rate constants fitted parameters

|                              |                                                                          | P-egg_Pt0.3_Cl1.4 | P-egg_Pt0.3_Cl1 | P-egg_Pt0.3_Cl0.5 | P-egg_Pt0.3_Cl0.1 | P-egg_Pt0.6_Cl1.4 | P-egg_Pt0.6_Cl1 | P-egg_Pt0.6_Cl0.5 | P-egg_Pt0.6_Cl0.1 | P-egg_Pt1.0_Cl1.4 | P-egg_Pt1.0_Cl0.1 |
|------------------------------|--------------------------------------------------------------------------|-------------------|-----------------|-------------------|-------------------|-------------------|-----------------|-------------------|-------------------|-------------------|-------------------|
| kref,Hydrogenolysis          | mol.h <sup>-1</sup> .kg <sub>cats</sub> <sup>-1</sup> .bar <sup>-2</sup> | 2.9               | 3.1             | 1.7               | 2.8               | 6.2               | 7.0             | 1.7               | 7.5               | 7.5               | 8.2               |
| Low Confidence Value         | mol.h <sup>-1</sup> .kg <sub>cats</sub> <sup>-1</sup> .bar <sup>-2</sup> | 2.8               | 3.0             | 1.6               | 2.7               | 6.0               | 6.8             | 1.6               | 7.2               | 7.3               | 8.0               |
| High Confidence Value        | mol.h <sup>-1</sup> .kg <sub>cats</sub> <sup>-1</sup> .bar <sup>-2</sup> | 3.0               | 3.2             | 1.7               | 2.9               | 6.3               | 7.2             | 1.8               | 7.7               | 7.7               | 8.4               |
| kref,Hydrocracking           | mol.h <sup>-1</sup> .kg <sub>cats</sub> <sup>-1</sup> .bar <sup>-2</sup> | 0.1               | 0.1             | 0.1               | 0.0               | 0.2               | 0.2             | 0.1               | 0.1               | 0.2               | 0.2               |
| Low Confidence Value         | mol.h <sup>-1</sup> .kg <sub>cats</sub> <sup>-1</sup> .bar <sup>-2</sup> | 0.1               | 0.1             | 0.0               | 0.0               | 0.2               | 0.2             | 0.1               | 0.0               | 0.2               | 0.1               |
| High Confidence Value        | mol.h <sup>-1</sup> .kg <sub>cats</sub> <sup>-1</sup> .bar <sup>-2</sup> | 0.2               | 0.2             | 0.1               | 0.0               | 0.2               | 0.2             | 0.1               | 0.1               | 0.3               | 0.2               |
| kref,6N7cyclisation          | mol.h <sup>-1</sup> .kg <sub>cats</sub> <sup>-1</sup> .bar <sup>-2</sup> | 104.4             | 96.8            | 86.7              | 64.1              | 116.2             | 110.8           | 93.3              | 79.5              | 122.4             | 88.0              |
| Low Confidence Value         | mol.h <sup>-1</sup> .kg <sub>cats</sub> <sup>-1</sup> .bar <sup>-2</sup> | 101.3             | 93.9            | 84.0              | 62.1              | 112.8             | 107.4           | 90.6              | 77.0              | 119.0             | 85.4              |
| High Confidence Value        | mol.h <sup>-1</sup> .kg <sub>cats</sub> <sup>-1</sup> .bar <sup>-2</sup> | 107.4             | 99.6            | 89.4              | 66.1              | 119.7             | 114.1           | 96.0              | 82.0              | 125.9             | 90.5              |
| kref,5N7cyclisation          | mol.h <sup>-1</sup> .kg <sub>cats</sub> <sup>-1</sup> .bar <sup>-2</sup> | 38.5              | 37.0            | 37.3              | 14.6              | 30.2              | 25.3            | 44.6              | 10.9              | 35.3              | 17.5              |
| Low Confidence Value         | mol.h <sup>-1</sup> .kg <sub>cats</sub> <sup>-1</sup> .bar <sup>-2</sup> | 29.6              | 28.3            | 27.5              | 11.4              | 23.4              | 19.5            | 34.2              | 8.6               | 28.7              | 14.4              |
| High Confidence Value        | mol.h <sup>-1</sup> .kg <sub>cats</sub> <sup>-1</sup> .bar <sup>-2</sup> | 47.3              | 45.6            | 47.0              | 17.8              | 37.0              | 31.1            | 55.0              | 13.2              | 41.8              | 20.6              |
| kref,Hydroisomerisation      | mol.h <sup>-1</sup> .kg <sub>cats</sub> <sup>-1</sup> .bar <sup>-1</sup> | 17.1              | 15.2            | 11.8              | 5.4               | 16.8              | 15.2            | 13.1              | 3.1               | 18.3              | 7.1               |
| Low Confidence Value         | mol.h <sup>-1</sup> .kg <sub>cats</sub> <sup>-1</sup> .bar <sup>-1</sup> | 16.2              | 14.3            | 11.1              | 5.0               | 15.8              | 14.4            | 12.4              | 2.8               | 17.3              | 6.5               |
| High Confidence Value        | mol.h <sup>-1</sup> .kg <sub>cats</sub> <sup>-1</sup> .bar <sup>-1</sup> | 18.1              | 16.0            | 12.5              | 5.8               | 17.7              | 16.1            | 13.9              | 3.4               | 19.4              | 7.6               |
| kref,Naiphth,Dehydrogenation | a.u                                                                      | 386.9             | 347.2           | 389.1             | 277.5             | 446.4             | 414.1           | 373.3             | 281.7             | 560.3             | 363.1             |
| Low Confidence Value         | a.u                                                                      | 349.7             | 313.9           | 347.5             | 249.4             | 402.8             | 373.0           | 338.1             | 254.2             | 514.0             | 333.8             |
| High Confidence Value        | a.u                                                                      | 424.1             | 380.4           | 430.8             | 305.5             | 490.1             | 455.3           | 408.5             | 309.2             | 606.7             | 392.3             |

  

|                              |                                                                          | T-flat_Pt0.3_Cl1.3 | T-flat_Pt0.3_Cl0.9 | T-flat_Pt0.3_Cl0.5 | T-flat_Pt0.3_Cl0.1 | T-flat_Pt0.6_Cl1.3 | T-flat_Pt0.6_Cl0.9 | T-flat_Pt0.6_Cl0.1 | T-flat_Pt1_Cl1.3 | T-flat_Pt1_Cl0.1 |
|------------------------------|--------------------------------------------------------------------------|--------------------|--------------------|--------------------|--------------------|--------------------|--------------------|--------------------|------------------|------------------|
| kref,Hydrogenolysis          | mol.h <sup>-1</sup> .kg <sub>cats</sub> <sup>-1</sup> .bar <sup>-2</sup> | 2.8                | 4.4                | 1.1                | 5.6                | 9.7                | 7.1                | 10.2               | 10.2             | 15.4             |
| Low Confidence Value         | mol.h <sup>-1</sup> .kg <sub>cats</sub> <sup>-1</sup> .bar <sup>-2</sup> | 2.7                | 4.3                | 1.0                | 5.5                | 9.6                | 7.0                | 10.1               | 10.1             | 15.3             |
| High Confidence Value        | mol.h <sup>-1</sup> .kg <sub>cats</sub> <sup>-1</sup> .bar <sup>-2</sup> | 2.9                | 4.6                | 1.1                | 5.7                | 9.8                | 7.3                | 10.3               | 10.4             | 15.5             |
| kref,Hydrocracking           | mol.h <sup>-1</sup> .kg <sub>cats</sub> <sup>-1</sup> .bar <sup>-2</sup> | 0.2                | 0.2                | 0.1                | 0.0                | 0.2                | 0.1                | 0.0                | 0.2              | 0.0              |
| Low Confidence Value         | mol.h <sup>-1</sup> .kg <sub>cats</sub> <sup>-1</sup> .bar <sup>-2</sup> | 0.1                | 0.2                | 0.1                | 0.0                | 0.2                | 0.1                | 0.0                | 0.1              | 0.0              |
| High Confidence Value        | mol.h <sup>-1</sup> .kg <sub>cats</sub> <sup>-1</sup> .bar <sup>-2</sup> | 0.2                | 0.2                | 0.1                | 0.1                | 0.2                | 0.2                | 0.1                | 0.2              | 0.1              |
| kref,6N7cyclisation          | mol.h <sup>-1</sup> .kg <sub>cats</sub> <sup>-1</sup> .bar <sup>-2</sup> | 125.9              | 112.1              | 86.8               | 77.9               | 124.8              | 120.9              | 91.0               | 128.4            | 106.0            |
| Low Confidence Value         | mol.h <sup>-1</sup> .kg <sub>cats</sub> <sup>-1</sup> .bar <sup>-2</sup> | 124.7              | 110.1              | 85.7               | 76.6               | 123.2              | 118.9              | 89.5               | 126.8            | 104.3            |
| High Confidence Value        | mol.h <sup>-1</sup> .kg <sub>cats</sub> <sup>-1</sup> .bar <sup>-2</sup> | 127.2              | 114.0              | 87.8               | 79.1               | 126.4              | 122.8              | 92.5               | 130.1            | 107.6            |
| kref,5N7cyclisation          | mol.h <sup>-1</sup> .kg <sub>cats</sub> <sup>-1</sup> .bar <sup>-2</sup> | 12.1               | 26.4               | 12.9               | 16.6               | 10.3               | 9.4                | 5.1                | 7.6              | 6.7              |
| Low Confidence Value         | mol.h <sup>-1</sup> .kg <sub>cats</sub> <sup>-1</sup> .bar <sup>-2</sup> | 10.5               | 24.2               | 9.3                | 14.4               | 9.3                | 8.2                | 4.7                | 7.0              | 6.1              |
| High Confidence Value        | mol.h <sup>-1</sup> .kg <sub>cats</sub> <sup>-1</sup> .bar <sup>-2</sup> | 13.7               | 28.5               | 16.5               | 18.8               | 11.4               | 10.6               | 5.4                | 8.2              | 7.3              |
| kref,Hydroisomerisation      | mol.h <sup>-1</sup> .kg <sub>cats</sub> <sup>-1</sup> .bar <sup>-1</sup> | 16.8               | 12.9               | 10.0               | 3.7                | 10.4               | 9.3                | 2.4                | 8.3              | 2.7              |
| Low Confidence Value         | mol.h <sup>-1</sup> .kg <sub>cats</sub> <sup>-1</sup> .bar <sup>-1</sup> | 16.4               | 12.4               | 9.7                | 3.4                | 10.0               | 8.8                | 2.1                | 7.9              | 2.3              |
| High Confidence Value        | mol.h <sup>-1</sup> .kg <sub>cats</sub> <sup>-1</sup> .bar <sup>-1</sup> | 17.1               | 13.4               | 10.3               | 4.0                | 10.7               | 9.8                | 2.8                | 8.7              | 3.1              |
| kref,Naiphth,Dehydrogenation | a.u                                                                      | 426.8              | 314.9              | 244.3              | 300.5              | 331.1              | 337.6              | 234.8              | 345.4            | 242.6            |
| Low Confidence Value         | a.u                                                                      | 404.2              | 287.2              | 229.5              | 273.1              | 311.7              | 313.4              | 220.9              | 330.2            | 225.4            |
| High Confidence Value        | a.u                                                                      | 449.4              | 342.7              | 259.2              | 327.9              | 350.5              | 361.8              | 248.6              | 360.6            | 259.9            |

Figure 4: Reference rate constants fitted on P-egg and T-flat catalysts. 6N cyclisation parameters were not statistically relevant.
